# Supplementary material for: Crystal structures, crystallization and II–I transition behaviors of iPB-1 in iPB-1/UHMWPE blends. Part 1. Crystal structures and crystallization behaviors
Source: Royal Society of Chemistry journal article supplement (doi:10.1039/d2ce00454b), 2022-01-01
Supplement: d2ce00454b1.pdf [file d2ce00454b1.pdf]

## Crystal structures, crystallization and II-I transition behaviors of iPB-1 in iPB-1/UHMWPE blends - Part 1. Crystal structures and crystallization behaviors

Yuanxing Liu, Jingqing Li\*

School of Materials Science and Engineering, Tianjin University, Tianjin 300072, China

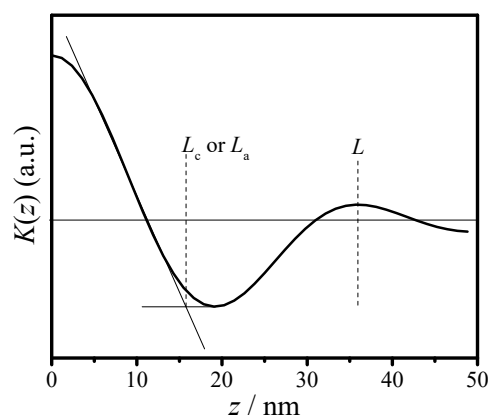

**Figure S1** Schematics of crystalline lamella thickness  $d_c$  determination from the one dimension electron density correlation function as shown in Equation (1).

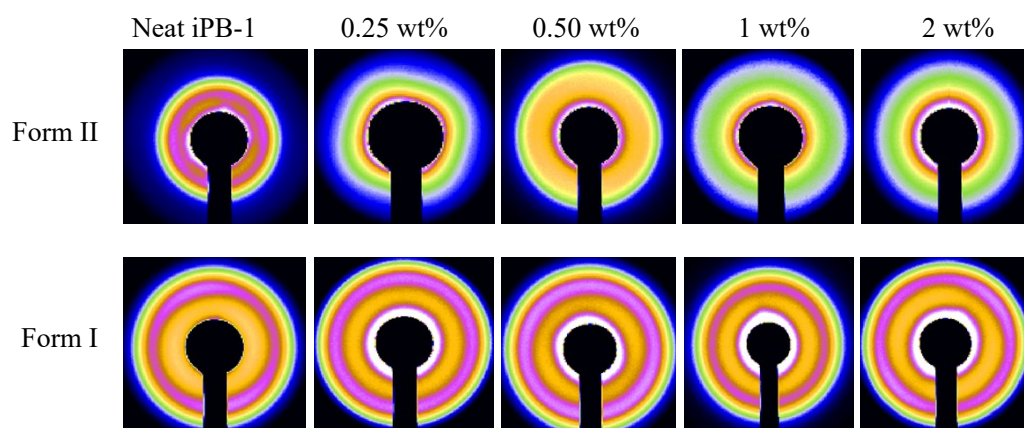

**Figure S2** The 2D-SAXS patterns of the non-isothermally as-crystallized form II and of the transitioned form I of iPB-1 in the iPB-1/PE4012 blends with various PE4012 weight proportions collected at 100 °C and at room temperature, respectively.

---

\* Corresponding authors: [jqli11103@tju.edu.cn](mailto:jqli11103@tju.edu.cn)

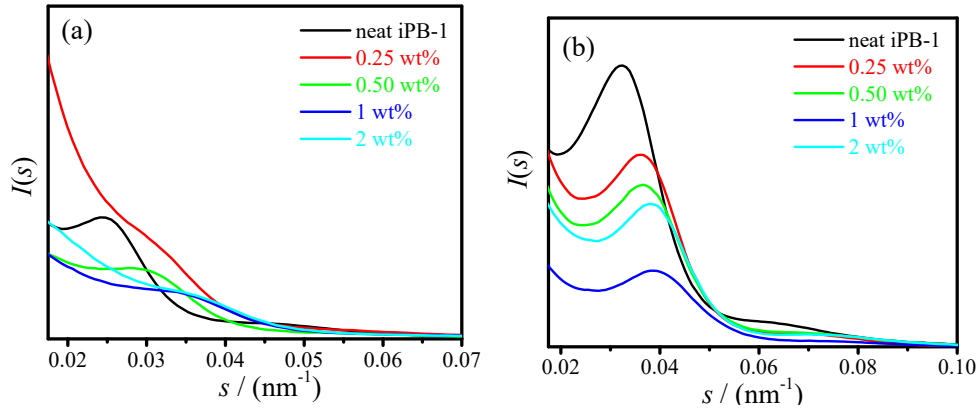

**Figure S3** 1D-SAXS profiles of the non-isothermally as-crystallized form II (a) and transited form I (b) of iPB-1 in the iPB-1/PE4012 blends with various PE4012 weight proportions.

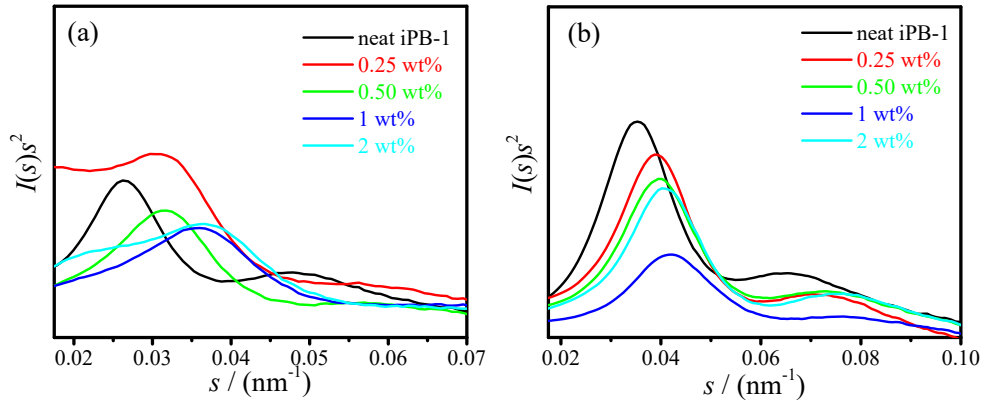

**Figure S4** Lorentz-corrected SAXS data of the non-isothermally as-crystallized form II (a) and transited form I (b) of iPB-1 in the iPB-1/PE4012 blends with various PE4012 weight proportions.

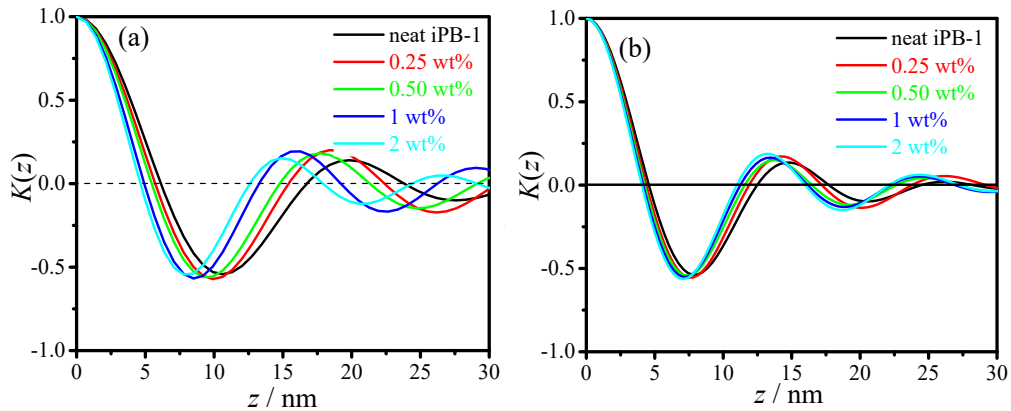

**Figure S5** One dimension electron density correlation function plots of the non-isothermally as-crystallized form II (a) and transited form I (b) of iPB-1 in the iPB-1/PE4012 blends with various PE4012 weight proportions.

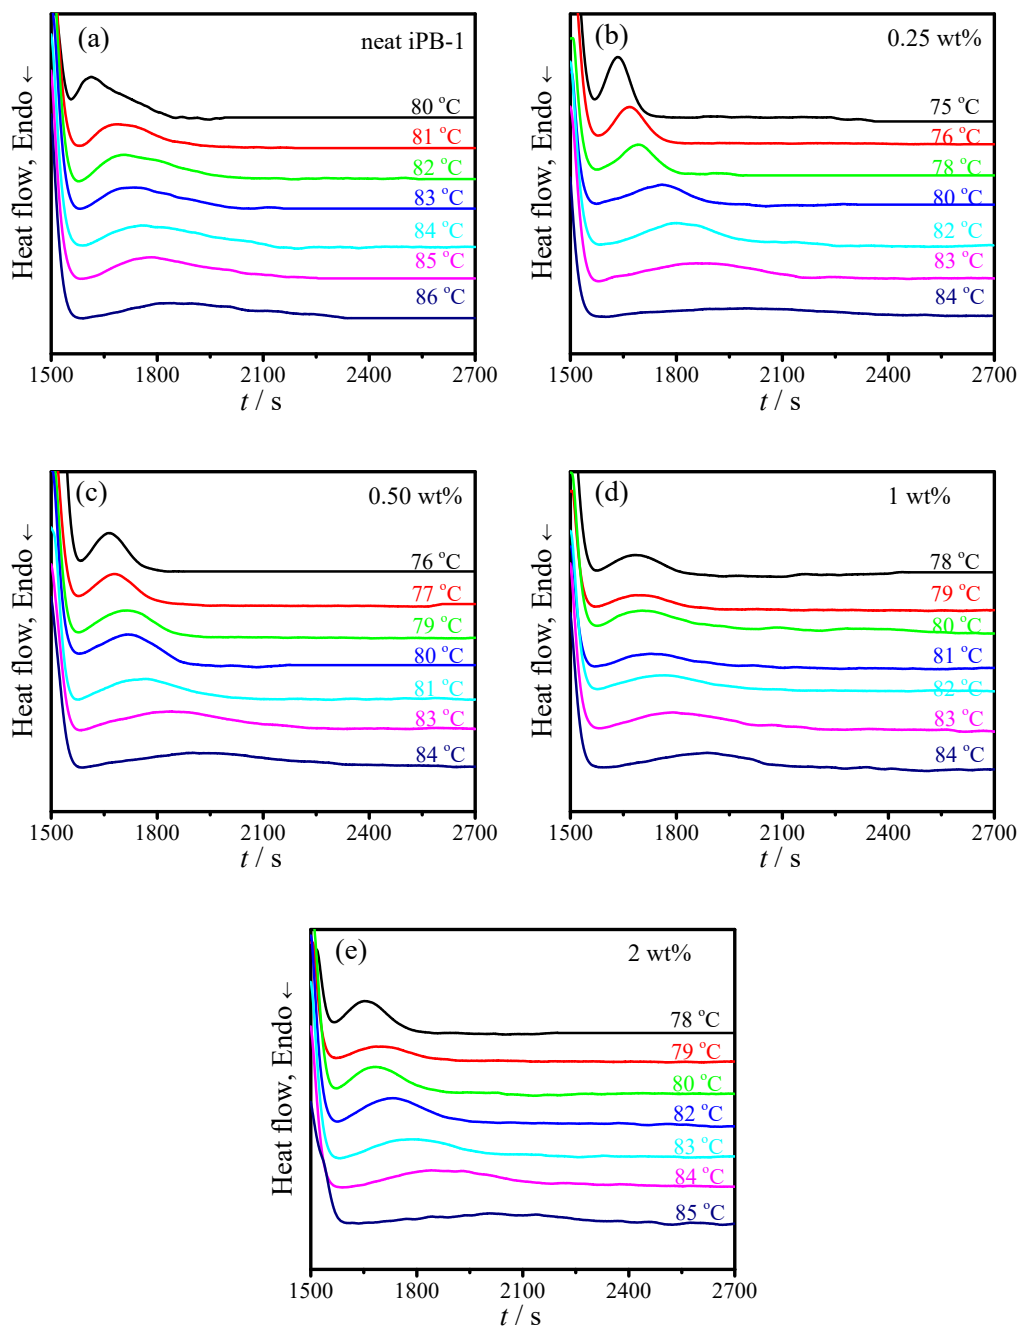

**Figure S6** DSC isothermal crystallization curves collected at typical isothermal crystallization temperatures  $T_c$ s of iPB-1 in the iPB-1/PE4012 blend samples with various PE4012 weight proportions. (a) neat iPB-1, (b) 0.25 wt%, (c) 0.50 wt%, (d) 1 wt% and (e) 2 wt%.

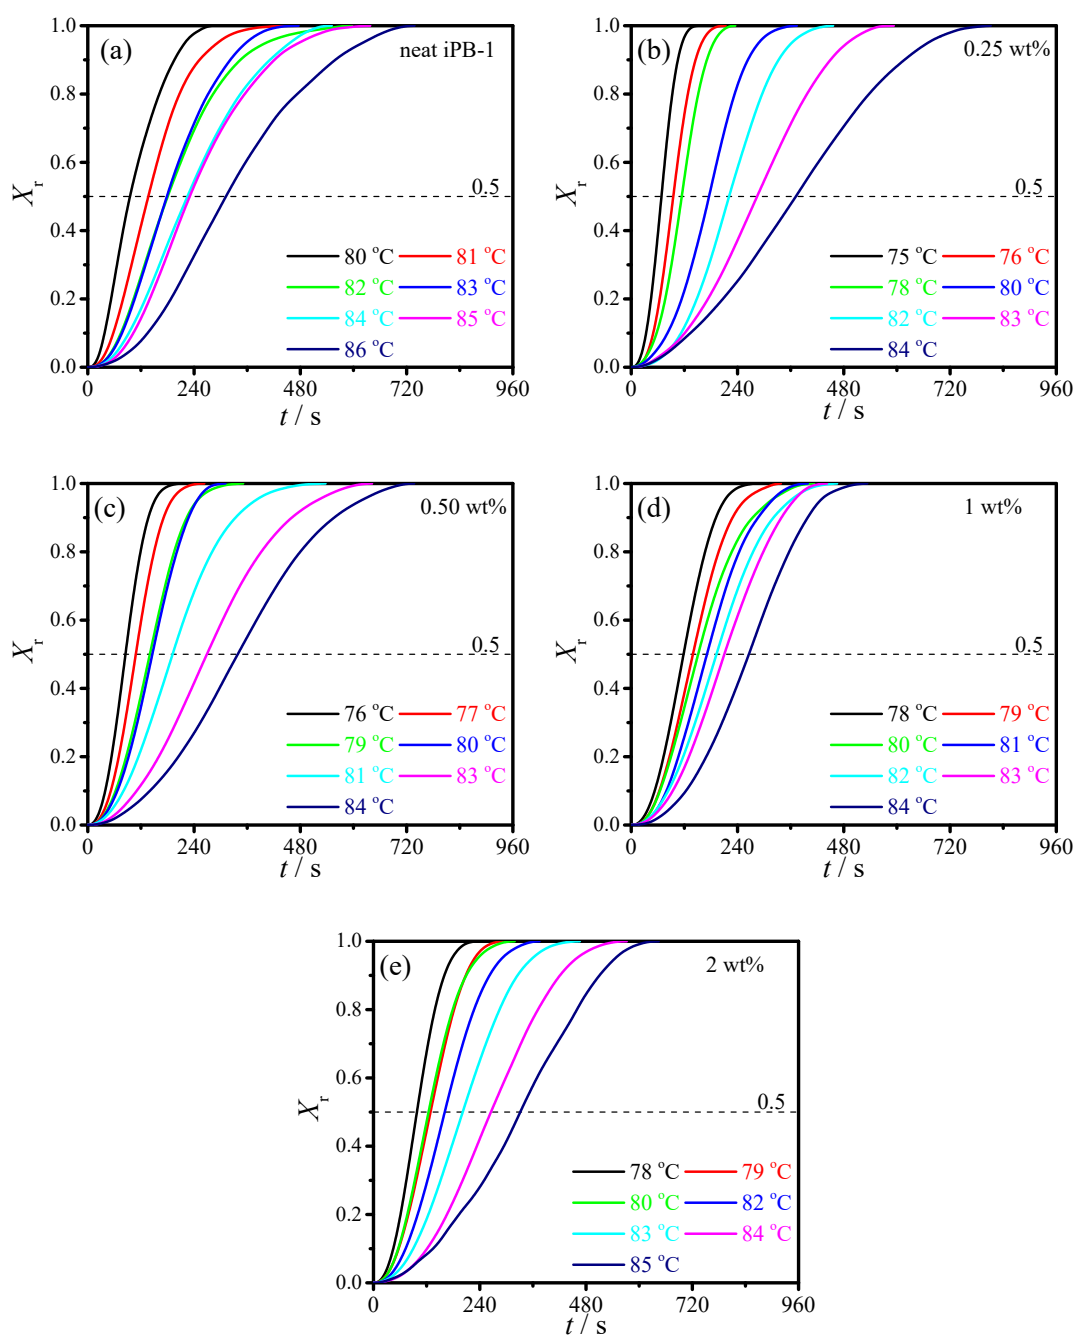

**Figure S7** The relative crystallinity degrees  $X_r$  varying with the isothermal crystallization time  $t$  at various isothermal crystallization temperatures  $T_c$ s of iPB-1 in the iPB-1/PE4012 blend samples containing various PE4012 weight proportions. (a) neat iPB-1, (b) 0.25 wt%, (c) 0.50 wt%, (d) 1 wt% and (e) 2 wt%.

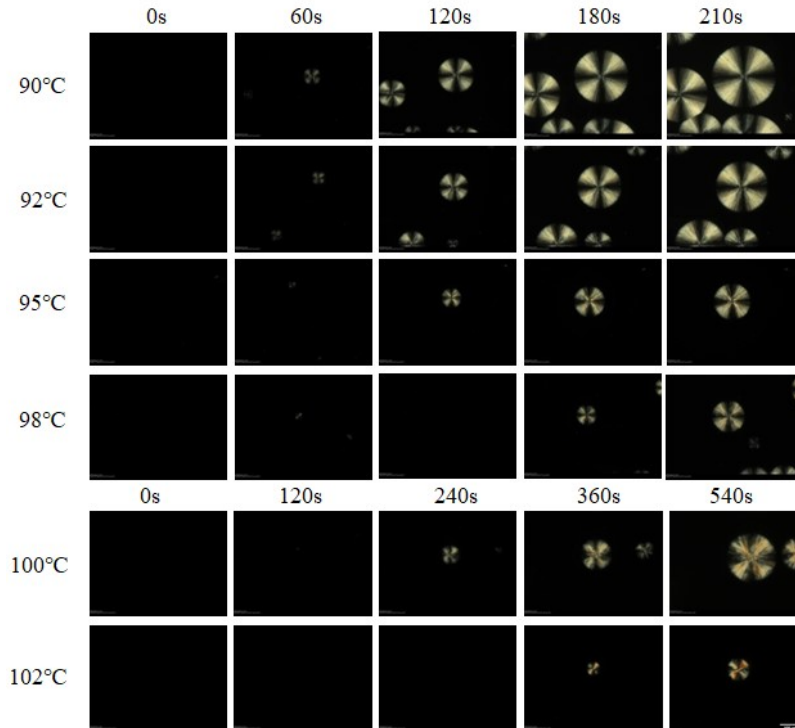

**Figure S8** POM images of neat iPB-1 obtained at various isothermal crystallization temperatures  $T_c$ s for different time after melting at 200 °C for 5 min and rapidly cooling to the  $T_c$ s.

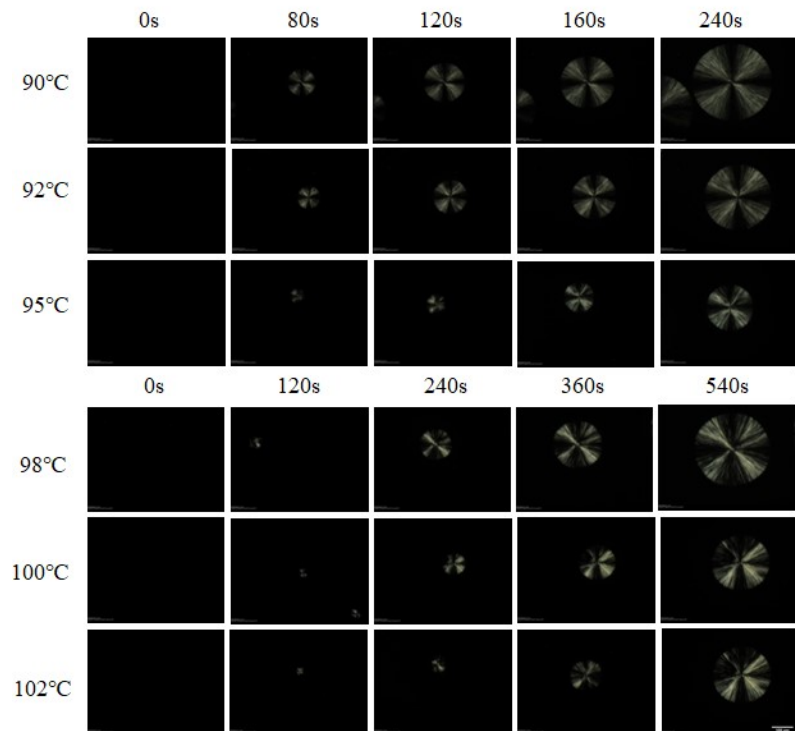

**Figure S9** POM images of the iPB-1/PE4012 with PE4012 weight proportion of 0.25 wt% obtained at various isothermal crystallization temperatures  $T_c$ s for different time after melting at 200 °C for 5 min and rapidly cooling to the  $T_c$ s.

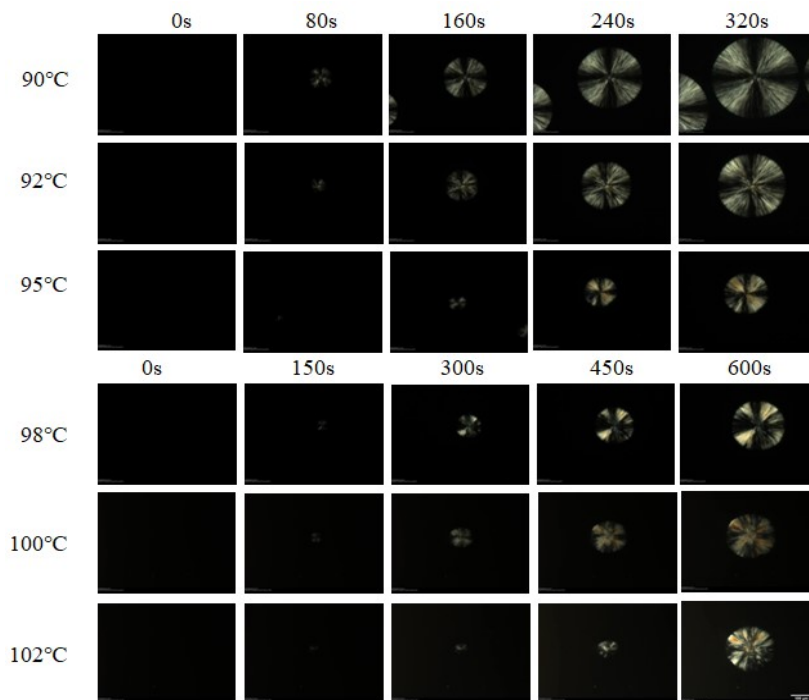

**Figure S10** POM images of the iPB-1/PE4012 with PE4012 weight proportion of 0.50 wt% obtained at various isothermal crystallization temperatures  $T_c$ s for different time after melting at 200 °C for 5 min and rapidly cooling to the  $T_c$ s.

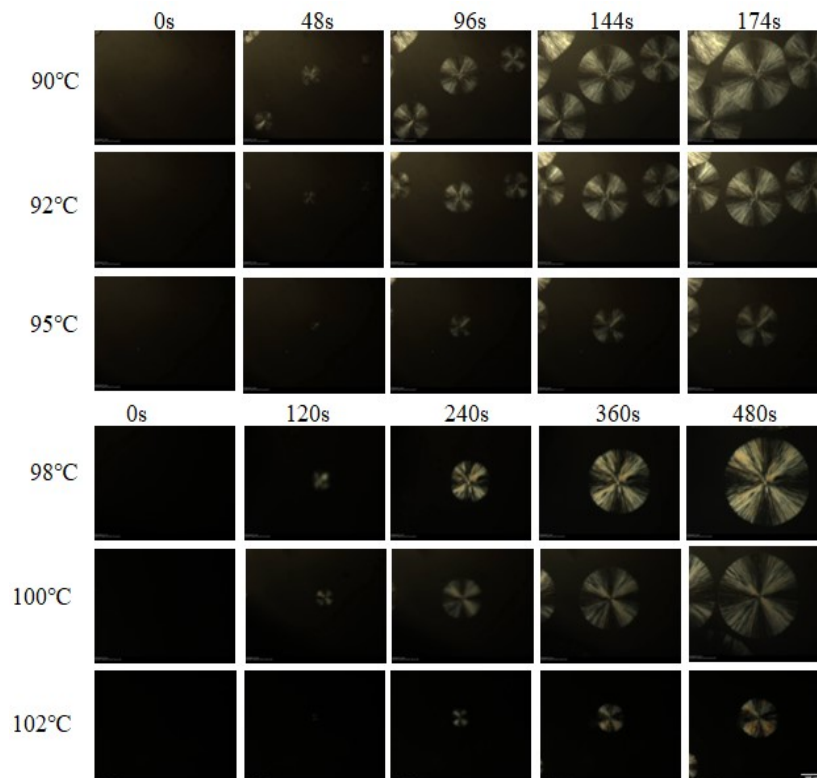

**Figure S11** POM images of the iPB-1/PE4012 with PE4012 weight proportion of 1 wt% obtained at various isothermal crystallization temperatures  $T_c$ s for different time after melting at 200 °C for 5 min and rapidly cooling to the  $T_c$ s.

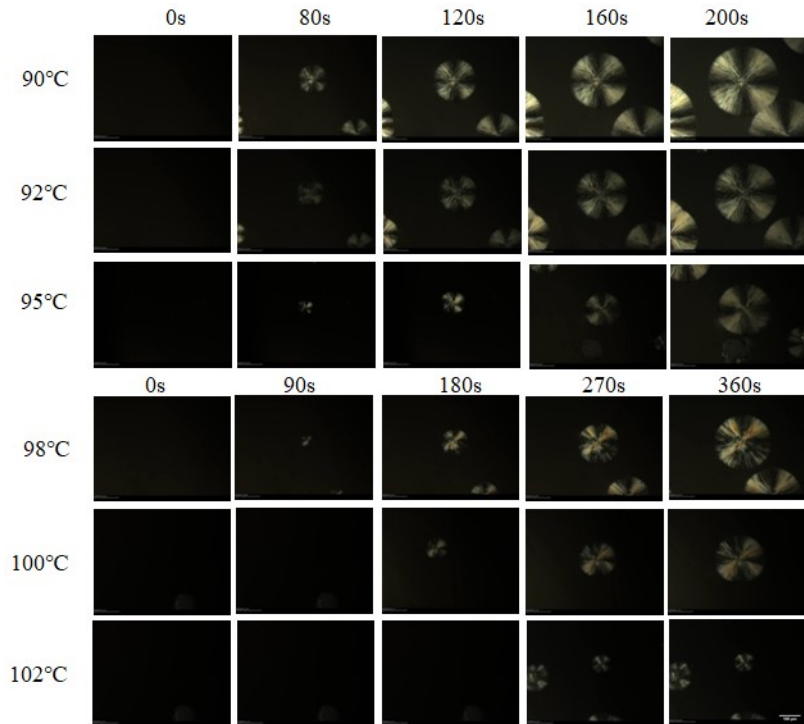

**Figure S12** POM images of the iPB-1/PE4012 with PE4012 weight proportion of 2 wt% obtained at various isothermal crystallization temperatures  $T_c$ s for different time after melting at 200 °C for 5 min and rapidly cooling to the  $T_c$ s.

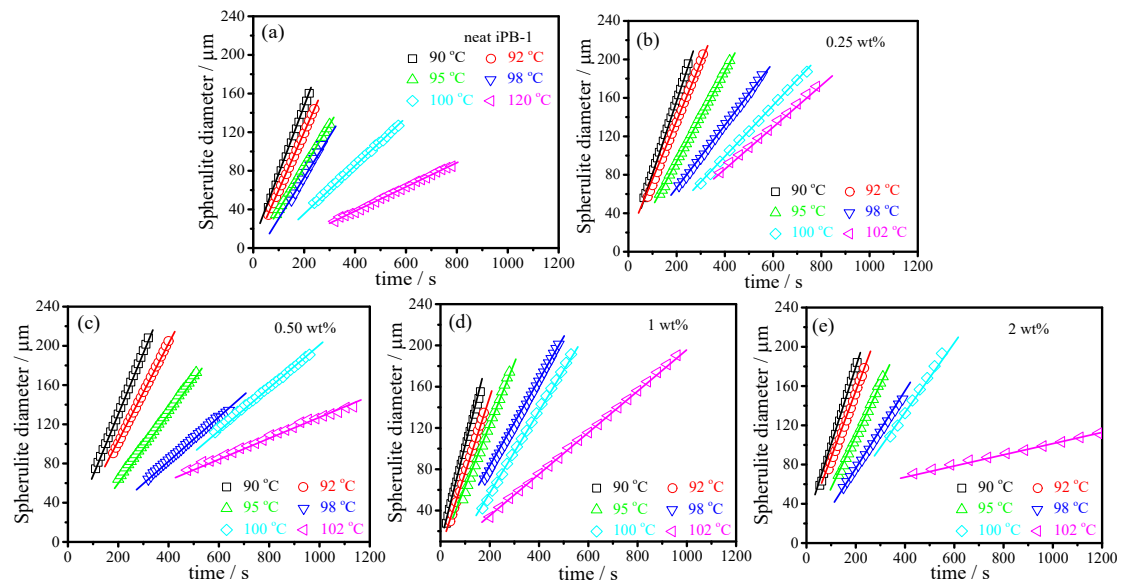

**Figure S13** The spherulite sizes linearly dependent on the isothermal crystallization time at various isothermal crystallization temperatures  $T_c$ s for the iPB-1/PE4012 blends with various PE4012 weight proportions after melting at 200 °C for 5 min and then rapidly cooling to the  $T_c$ s. (a) neat iPB-1, (b) 0.25 wt%, (c) 0.50 wt%, (d) 1 wt% and (e) 2 wt%.
